# Supplementary material for: Dietary Polyphenols Protect Against Oleic Acid-Induced Steatosis in an in Vitro Model of NAFLD by Modulating Lipid Metabolism and Improving Mitochondrial Function
Source: PubMed Central journal article supplement (PMC6471211; doi:10.3390/nu11030541), 2019-03-03
Supplement: nutrients-11-00541-s001.pdf [file nutrients-11-00541-s001.pdf]

Supplemental Table S1: The sequences of primers used to measure the expression of genes of interest.

| <b>Gene</b>   | <b>Species</b> | <b>Primer sequence (5'-3')</b>                                                   | <b>GenBank accession number</b> | <b>Cycles (Ct values)</b> |
|---------------|----------------|----------------------------------------------------------------------------------|---------------------------------|---------------------------|
| SIRT1         | Human          | Forward: AGT GGC AAA GGA GCA GAT TAG<br>Reverse: CTG CCA CAA GAA CTA GAG GAT AAG | NM_001142498                    | 24                        |
| SIRT3         | Human          | Forward: GAA AGC CTA GTG GAG CTT CTG<br>Reverse: GGG CAG CCATCA TCC TAT TT       | NM_012239                       | 24                        |
| PPAR $\alpha$ | Human          | Forward: TCC TCG GTG ACT TAT CCT GT<br>Reverse: GCGTGG ACT CCGTAATGA TAG         | NM_001001928                    | 27                        |
| PPAR $\gamma$ | Human          | Forward: GCCTGC ATC TCC ACCTTATTA<br>Reverse: ATC TCC ACA GAC ACG ACATTC         | NM_005037                       | 23                        |
| CPT1A1        | Human          | Forward: AGC GTT CTT CGT GAC GTT AG<br>Reverse: CGG CCGTGT AGT AGA GAT TTG       | NM_001876                       | 24                        |
| FAS           | Human          | Forward: TGT CCT GGG AGG AGT GTA AA<br>Reverse: CTG CTC CAC GAA CTC AAA CA       | NM_004104                       | 21                        |
| GAPDH         | Human          | Forward: ATG GGT GTG AAC CAT GAG AAG<br>Reverse: GAGTCC TTC CAC GAT ACC AAA G    | NM_002046                       | 17                        |
